# Supplementary material for: Liver Expression of IGF2 and Related Proteins in ZBED6 Gene-Edited Pig by RNA-Seq
Source: PubMed Central journal article supplement (PMC7700129; doi:10.3390/ani10112184), 2020-11-22
Supplement: animals-10-02184-s001.pdf [file animals-10-02184-s001.pdf]

**Table S1** Blood physiological index of *ZBED6* KO pig and wild type.

| blood physiological index | KO<br>(mean±SD)          | SKO<br>(mean±SD)        | Wild type<br>(mean±SD)    | P value | Unit                |
|---------------------------|--------------------------|-------------------------|---------------------------|---------|---------------------|
| WBC                       | 18.37±1.17               | 17.87±1.74              | 18.65±2.97                | 0.901   | 10 <sup>9</sup> /L  |
| NEU#                      | 6.38±1.64                | 5.12±0.26               | 7.32±0.81                 | 0.113   | 10 <sup>9</sup> /L  |
| LYMPH#                    | 9.75±1.85                | 10.33±1.25              | 9.79±3.62                 | 0.949   | 10 <sup>9</sup> /L  |
| MONO#                     | 1.12±0.07 <sup>a</sup>   | 1.03±0.06 <sup>ab</sup> | 0.82±0.20 <sup>b</sup>    | 0.070   | 10 <sup>9</sup> /L  |
| EO#                       | 0.77±0.24                | 1.16±0.76               | 0.52±0.38                 | 0.361   | 10 <sup>9</sup> /L  |
| BASO#                     | 0.36±0.13                | 0.23±0.03               | 0.19±0.13                 | 0.213   | 10 <sup>9</sup> /L  |
| NEU%                      | 34.87±9.12               | 28.87±3.5               | 40.37±10.45               | 0.305   | %                   |
| LYMPH%                    | 53.00±8.36               | 57.77±3.78              | 51.40±11.32               | 0.649   | %                   |
| MONO%                     | 6.07±0.42 <sup>a</sup>   | 5.77±0.29 <sup>ab</sup> | 4.33±0.47 <sup>b</sup>    | 0.004   | %                   |
| EOS%                      | 4.17±1.08                | 6.33±3.49               | 2.83±1.96                 | 0.272   | %                   |
| BASO%                     | 1.90±0.60                | 1.27±0.12               | 1.07±0.70                 | 0.221   | %                   |
| RBC                       | 7.91±0.19                | 7.61±0.48               | 7.68±1.12                 | 0.865   | 10 <sup>12</sup> /L |
| HGB                       | 155.33±13.01             | 144.67±4.04             | 162.67±24.38              | 0.44    | g/L                 |
| HCT                       | 49.07±3.56               | 43.90±0.79              | 49.83±8.02                | 0.362   | %                   |
| MCV                       | 62.00±4.00               | 57.87±3.58              | 64.83±2.55                | 0.117   | fL                  |
| MCH                       | 19.63±1.50               | 19.10±1.30              | 21.20±0.50                | 0.157   | Pg                  |
| MCHC                      | 316.33±4.16 <sup>b</sup> | 330±3.61 <sup>a</sup>   | 326.67±5.86 <sup>ab</sup> | 0.026   | g/L                 |
| RDW-CV                    | 19.50±1.73               | 18.07±1.27              | 17.70±1.47                | 0.364   | %                   |
| RDW-SD                    | 41.33±1.53               | 36.33±1.15              | 39.33±4.04                | 0.135   | L                   |
| PLT                       | 219.67±90.91             | 209.33±81.99            | 321.67±55.29              | 0.226   | 10 <sup>9</sup> /L  |
| MPV                       | 9.77±2.11                | 9.23±0.71               | 9.53±0.91                 | 0.897   | fL                  |
| PDW                       | 14.90±0.10               | 14.97±0.21              | 15.20±0.26                | 0.242   | fL                  |
| PCT                       | 0.22±0.11                | 0.19±0.07               | 0.31±0.08                 | 0.311   | %                   |
| P-LCC                     | 71.33±57.07              | 52.67±17.67             | 89.67±38.84               | 0.576   | 10 <sup>9</sup> /L  |
| P-LCR                     | 31.03±17.75              | 26.03±6.34              | 27.13±7.56                | 0.863   | %                   |

**Notes:** KO: knockout; SKO: single knockout; WBC: White blood cell count; NEU#: neutrophil number; LYMPH#: lymphocyte number; MONO#: monocyte number; EO#: eosinophil number; BASO#: basophil number; NEU%: neutrophil percentage; LYMPH%: lymphocyte percentage; MONO%: monocyte percentage; EOS%: eosinophil percentage; BASO%: basophil percentage; RBC:

Red blood cell number; HGB: hemoglobin; HCT:hematocrit; MCV: average red blood cell volume; MCH: average red blood cell hemoglobin amount; MCHC: average red blood cell hemoglobin concentrated; RDW-CV: red blood cell distribution width variation; RDW-SD: red blood cell distribution width standard deviation; PLT: platelet number; MPV: average platelet volume; PDW: platelet distribution width, PCT: small blood; P-LCC: large platelet count; P-LCR: large platelet ratio.

**Table S2** Serum biochemical index of *ZBED6* KO pig and wild type.

| serum biochemical index | KO<br>(mean±SD)        | SKO<br>(mean±SD)        | Wild type<br>(mean±SD) | <i>P</i> value | Unit   |
|-------------------------|------------------------|-------------------------|------------------------|----------------|--------|
| TP                      | 71.67±6.88             | 68.53±3.72              | 70.4±6.87              | 0.819          | g/L    |
| Alb                     | 39.87±6.38             | 35.47±3.57              | 36.67±4.24             | 0.555          | g/L    |
| ALT                     | 44.67±2.52             | 43±18.03                | 41±15.72               | 0.949          | U/L    |
| AST                     | 25.67±5.77             | 30±9.54                 | 30.67±5.86             | 0.676          | U/L    |
| ALP                     | 65.67±18.45            | 84.33±61.45             | 193.33±138.35          | 0.238          | U/L    |
| Urea                    | 4.86±0.37              | 3.81±0.86               | 3.58±0.72              | 0.122          | mmol/L |
| TG                      | 0.55±0.14 <sup>b</sup> | 1.04±0.36 <sup>ab</sup> | 1.3±0.44 <sup>a</sup>  | 0.086          | mmol/L |
| HDL-C                   | 1.17±0.33              | 0.97±0.13               | 0.88±0.19              | 0.337          | mmol/L |
| LDL-C                   | 1.04±0.16              | 1.04±0.14               | 0.93±0.15              | 0.600          | mmol/L |
| LDH                     | 396±103.06             | 422.67±110.53           | 333±7.55               | 0.479          | IU/L   |

**Notes:** KO:knockout; SKO:single knockout; TP: Total protein; Alb: albumin; ALT: alanine aminotransferase; AST: aspartate aminotransferase; ALP: alkaline phosphatase; TG: triglyceride; HDL-C: high density lipoprotein cholesterol; LDL-C: low density lipoprotein cholesterol; LDH: lactate deaerase.

**Table S3** GO and KEGG pathways with significant *P* value

| Category         | Term                                                                            | Count | Genes                                                                        | <i>P</i> Value |
|------------------|---------------------------------------------------------------------------------|-------|------------------------------------------------------------------------------|----------------|
| KEGG_PATHWAY     | ssc00061:Fatty acid biosynthesis                                                | 2     | ACACA, ACSBG1                                                                | 0.049032894    |
| KEGG_PATHWAY     | ssc04668:TNF signaling pathway                                                  | 3     | TNFRSF1B, EDN1,<br>RIPK3                                                     | 0.064455591    |
| GOTERM_MF_DIRECT | GO:0005524~ATP binding                                                          | 10    | ACTG1, GSS, RECQL,<br>ATP2B4, MYO7A,<br>DDX39B, ACACA,<br>RIPK3, PKN2, CDK10 | 0.010846371    |
| GOTERM_CC_DIRECT | GO:0000346~transcription export complex                                         | 2     | DDX39B, NXF1                                                                 | 0.014571141    |
| GOTERM_BP_DIRECT | GO:0033077~T cell differentiation in thymus                                     | 2     | ZFP36L1, RIPK3                                                               | 0.063257527    |
| GOTERM_BP_DIRECT | GO:0034097~response to cytokine                                                 | 2     | RELB, ACP5                                                                   | 0.06968484     |
| GOTERM_BP_DIRECT | GO:0007249~I-kappaB kinase/NF-kappaB signaling                                  | 2     | RELB, RIPK3                                                                  | 0.079245316    |
| GOTERM_BP_DIRECT | GO:0035914~skeletal muscle cell differentiation                                 | 2     | MEF2D, BCL9                                                                  | 0.085565711    |
| GOTERM_BP_DIRECT | GO:0000122~negative regulation of transcription from RNA polymerase II promoter | 4     | PHF14, RELB, EDN1,<br>NR0B2                                                  | 0.092808295    |
